# Supplementary material
Source: PubMed Central journal article supplement (PMC2719338)
Supplement: M109.008342_1.pdf [file M109.008342_1.pdf]

**Supplemental Table 2. Phenotypic characterization of mutant growth and fitness**

| Experiment and measured parameter | Wild type | <i>atnth1 atnth2 arp</i> | <i>atnth1 atnth2</i> | <i>atnth2 arp</i> | <i>atnth1</i> | <i>atnth2</i> | <i>arp</i> |
|-----------------------------------|-----------|--------------------------|----------------------|-------------------|---------------|---------------|------------|
| <b>1 Very high light*</b>         |           |                          |                      |                   |               |               |            |
| Seeds/half silique                | 21.18     | 21.47                    |                      |                   |               |               |            |
| SD, n = 24                        | 3.06      | 2.68                     |                      |                   |               |               |            |
| Siliques/plant                    | 192.6     | 197.6                    |                      |                   |               |               |            |
| SD                                | 32.9      | 48.3                     |                      |                   |               |               |            |
| Seeds/plant                       | 8118      | 8484                     |                      |                   |               |               |            |
| SD                                | 1323      | 2075                     |                      |                   |               |               |            |
| <b>2 Variable light†</b>          |           |                          |                      |                   |               |               |            |
| Seeds/half silique                | 26.67     | 25.58                    |                      |                   |               |               |            |
| SD, n = 45                        | 2.61      | 2.53                     |                      |                   |               |               |            |
| Siliques/plant                    | 312.6     | 308.4                    |                      |                   |               |               |            |
| SD, n = 9                         | 46.9      | 49.8                     |                      |                   |               |               |            |
| Total seeds/plant                 | 16722     | 15878                    |                      |                   |               |               |            |
| SD                                | 3113      | 3381                     |                      |                   |               |               |            |
| <b>3 Variable light‡</b>          |           |                          |                      |                   |               |               |            |
| seeds/ half silique               | 24.97     | 24.91                    |                      |                   |               |               |            |
| SD, n=31-34                       | 4.18      | 4.14                     |                      |                   |               |               |            |
| <b>4 Methyl viologen§</b>         |           |                          |                      |                   |               |               |            |
| 0.125 µM, fresh weight, mg        | 18.9      | 19.5                     | 18.7                 | 18.5              | 19.2          | 18.3          | 17.3       |
| SD, n = 7                         | 0.9       | 1.3                      | 1.6                  | 0.9               | 1.6           | 0.6           | 1.2        |
| 0.25 µM, fresh weight, mg         | 17.4      | 16.0                     | 16.7                 | 16.2              | 17.0          | 17.6          | 16.4       |
| SD, n = 6                         | 1.8       | 1.5                      | 0.7                  | 1.0               | 1.2           | 0.7           | 0.8        |

|                                   |      |      |      |      |      |      |      |  |
|-----------------------------------|------|------|------|------|------|------|------|--|
| 5 H <sub>2</sub> O <sub>2</sub> ¶ |      |      |      |      |      |      |      |  |
| 10 mM, fresh weight, mg           | 18.0 | 19.3 | 19.7 | 18.9 | 20.2 | 20.6 | 19.5 |  |
| SD, n=6-12                        | 1.7  | 1.2  | 1.9  | 1.4  | 1.4  | 2.3  | 0.4  |  |

\*Plants were grown in short days at low light ( $\sim 100 \mu\text{mol photons m}^{-2} \text{s}^{-1}$ ) for 2 months and then transferred to short days, very high light (VHL,  $1,800 \mu\text{mol photons m}^{-2} \text{s}^{-1}$ ) for 1 month, at which point the seeds from half of siliques number 12 and 20 on the main inflorescence stem and one randomly selected silique off an axial stem were counted. Plants were returned to VHL and allowed to develop to maturity, at which point total siliques/plant were counted.

†Plants were grown under variable light conditions (subject to fluctuating sunlight in an unshaded greenhouse). At the point when the silique was fully developed but not brittle, seeds from one half of siliques number 10, 12, and 14 from the primary inflorescence stem and 7 and 10 from one axial stem were counted. At maturity, all siliques on each plant were counted.

‡Experiment 3 was similar to Experiment 2, but only siliques 10 and 12 were counted (on more plants), and total siliques were not counted.

§Seedlings were grown in liquid culture in 96-well plates for 12 days. Methyl viologen was then added to a final concentration of 0.125 or 0.25  $\mu\text{M}$ , and plants were grown for 3 more weeks before the fresh weight of each whole plant was determined.

¶Experiment 5 was the same as Experiment 4, but using H<sub>2</sub>O<sub>2</sub> at a final concentration of 10 mM.  
SD, standard deviation.

**Supplemental Table 3. Oligonucleotide primers used**

| Number | Descriptive name  | Sequence, 5' -> 3'                            |
|--------|-------------------|-----------------------------------------------|
| BG1    | At2g41460cDNAL    | GGTTCTTTGCCTCTCCTTCC                          |
| BG2    | At2g41460cDNAR    | AAAAGCTGGGAATGGTGAAA                          |
| BG3    | 05900adaptL       | GATCGT <u>CGAC</u> CCAGGCCAGAAGGAGATATAA      |
| BG4    | 05900adaptR       | GTAC <u>CCATGG</u> CCACCTGTTTCGTTCCAGGTTTA    |
| BG5    | At2g31450gfpR     | TCGAC <u>CCATGG</u> TTCGGTTAGATTTCTTCA        |
| BG6    | At2g41460GFPL     | TCCTG <u>TCGAC</u> TCTCGAGTTTGTGCCCTT         |
| BG7    | At2g41460GFPR     | GCTAC <u>CCATGG</u> AACCGACACCAGGA            |
| BG8    | 05900.2cDNAL      | AAACACAAAAATTGATTGGCTCT                       |
| BG9    | 05900.2cDNAR      | GCTCTTGCATTCCCCATAAA                          |
| BG10   | 05900.2+12        | GCTAACGTAGGAC <u>ATATGA</u> ATCCAGAGCCAAAGCAA |
| BG11   | 05900-19          | AAGTGC <u>ACTGAAC</u> CATATGAATCGCCGTAT       |
| BG12   | Salk LBa1         | TGGTTCACGTAGTGGGCCATCG                        |
| BG13   | 013055L(05900L)   | GCTTCCTTGAAAGGTCGATG                          |
| BG14   | 013055R(05900R)   | AGGCCATTTTGATGAAGTCG                          |
| BG15   | 054181L           | CGGTTGACAAAGCTGATGAA                          |
| BG16   | 054181R           | CCTGGAAGAGACAGCAGGTC                          |
| BG17   | SAIL LB1          | GCCTTTTCAGAAATGGATAAATAGCCTTGCTTCC            |
| BG18   | 866_H10L          | AAGGAAATTGAGGCGATGACT                         |
| BG19   | 866_H10R          | AGTAGGCTCTTCCCTGTTGCT                         |
| BG20   | 05900expressionL  | CCACCTGAAA <u>ACTGGG</u> AAAA                 |
| BG21   | 05900expressionR  | GGACCAACTCCTGGAAGTGA                          |
| BG22   | 31450expression2L | TCCCACGGAAAGAAGATTTG                          |
| BG23   | 31450expressionR  | TTGAATGCAGCAGGACAAAG                          |
| BG24   | 41460expressionL  | CGTTGAGGAA <u>ACTTGGG</u> GTA                 |
| BG25   | 41460expressionR  | TCTGGTAGAGGGGGAGGTCT                          |
| BG26   | 30480expressionL  | GCTTGGGAAATCAGAGCAAG                          |
| BG27   | 30480expressionR  | GAACTGGAGCCA <u>ACTCG</u> TTC                 |

## Supplemental Figure Legends

**Supplemental Fig. 7.** RT-PCR of *AtNTH1* expression in mutants and wild type.

Agarose-gel analysis of PCR reactions (27-34 cycles) using first-strand cDNA template generated from total RNA and gene-specific primers. Lane 1, *atnth1 atnth2 arp* triple mutant; lane 2, *atnth1*; lane 3, *atnth2*; lane 4, *arp*; lane 5, wild type (Col-0); lane 6, no RNA control. Bottom row, detection of control mRNA (At1g40380) to confirm the presence of RNA. *AtNTH1* transcript is present at a very reduced level in the mutant and at a slightly greater, but not wild-type, level in the triple mutant. *AtNTH1* transcript is present at wild-type levels in the *atnth2* and *arp* mutant backgrounds.

**Supplemental Fig. 8.** Photos of wild type and T-DNA insertional mutants grown under standard short-day conditions. The triple mutant is *atnth1 atnth2 arp*.

**Supplemental Fig. 9.** Absence of AP sites in OsO<sub>4</sub>-treated plasmid DNA substrate.

Supercoiled plasmid substrate prepared as for glycosylase-lyase/endonuclease activity assay was incubated 15 min at 37°C with the indicated enzymes: T4 endonuclease V (PDG) (lanes 1-2), *E. coli* Nth as a positive control (lanes 3-4 and 9-10), no enzyme (lanes 5-6 and 11-12), and human Ape1 (lanes 7-8). The substrate and product were then separated on a 1% agarose gel. +, lanes with OsO<sub>4</sub>-treated plasmid; -, untreated control plasmid; OC, relaxed open circular plasmid product; SC, supercoiled plasmid substrate.

1 2 3 4 5 6

27 cycles

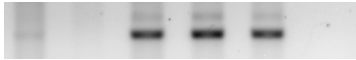

31 cycles

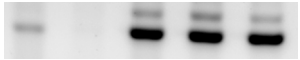

34 cycles

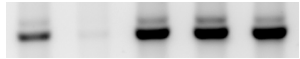

control primers, 34 cycles

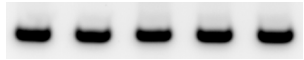

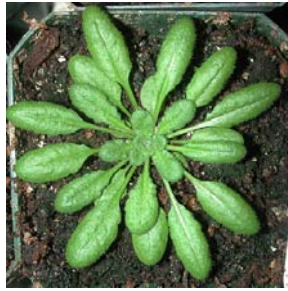

Col-0

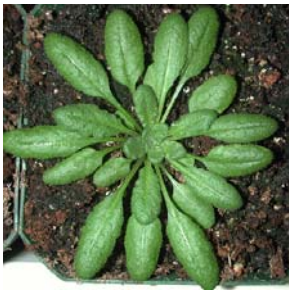

*atnth1*

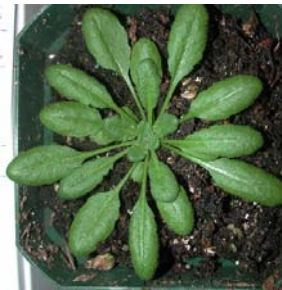

*atnth2*

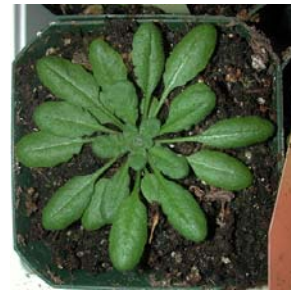

*arp*

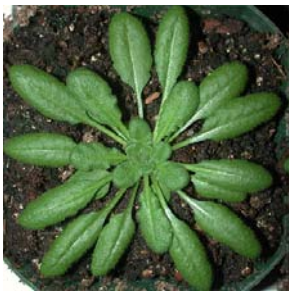

*atnth1 atnth2*

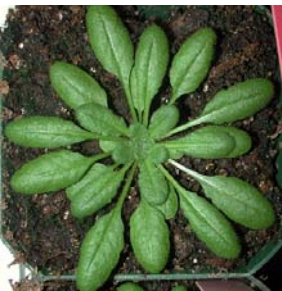

*arp atnth2*

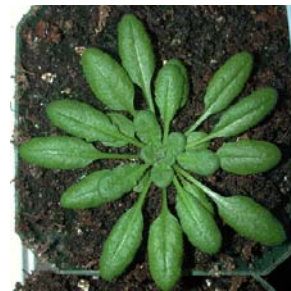

*atnth1 arp*

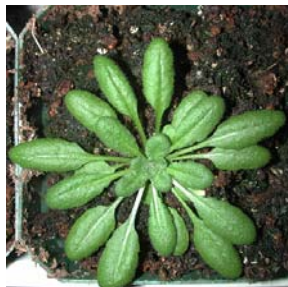

triple mutant
